# Supplementary material
Source: Research Square preprint supplement (doi:10.21203/rs.3.rs-8827731/v1)
Supplement: Supplementary file 1 [file ab93d97f3473117539c2095c.pdf]

**T.C.**  
**ORDU ÜNİVERSİTESİ**  
**KLİNİK ARAŞTIRMALAR ETİK KURULU KARARLARI**

| <b>Toplantı Tarihi</b> | <b>Toplantı Sayısı</b> | <b>Toplantı Saati</b> | <b>Karar Sayısı</b> |
|------------------------|------------------------|-----------------------|---------------------|
| 27.10.2020             | 22                     | 15.00                 | 2020-276            |

Ordu Üniversitesi Klinik Araştırmalar Etik Kurulu, “Klinik Araştırmalar ve Biyoyararlanım/Biyoeşdeğerlik Çalışmaları Etik Kurullarının Standart Çalışma Yöntemi Esasları” 11.2.1 maddesi uyarınca Etik Kurul Başkanı Doç. Dr. Ahmet KARATAŞ başkanlığında toplanarak aşağıdaki kararları almıştır.

**KARAR NO: 2020/276**

Sorumlu yürütücü Doç. Dr. Özgür DİNÇER’in , KAEK 219 Nolu başvurusunun değerlendirilmesi sonucu “**Fitness Egzersizlerinde Uygulanan İtme ve Çekme Hareketlerinin Kas Üzerindeki Etkisinin Elektromiyografi ile İncelenmesi**” başlıklı araştırmasının etik ilke ve kurallara uygunluk açısından yapılabilirliğine ve konunun ilgili öğretim üyesine tebliğine toplantıya katılanların oy birliği ile karar verildi.

**e-imzalıdır**  
**Doç. Dr. Ahmet KARATAŞ**  
**Ordu Üniversitesi**  
**Klinik Araştırmalar Etik Kurulu Başkanı**
